# Onsager regression characterizes living systems in passive measurements

Till M. Muenker<sup>1</sup>, Gabriel Knotz<sup>2</sup>, Matthias Krüger<sup>2\*</sup>, and Timo Betz<sup>1\*</sup>

<sup>1</sup>*Third Institute of Physics, Georg August Universität Göttingen, Göttingen, Germany*

<sup>2</sup>*Institute of Theoretical Physics, Georg August Universität Göttingen, Göttingen, Germany*

*\*Corresponding author*

## Abstract

Understanding life is arguably among the most complex scientific problems faced in modern research. From a physics perspective, living systems are complex dynamic entities that operate far from thermodynamic equilibrium.<sup>1-3</sup> This active, non-equilibrium behaviour, with its constant hunger for energy, allows life to overcome the ever dispersing forces of entropy, and hence drives cellular organisation and dynamics at the micrometer scale.<sup>4,5</sup> Unfortunately, most analysis methods provided by the powerful toolbox of statistical mechanics cannot be used in such non-equilibrium situations, forcing researchers to use sophisticated and often invasive approaches to study the mechanistic processes inside living organisms. Here we introduce a new observable coined the mean back relaxation, that allows simple detection of broken detailed balance and full quantification of the active mechanics from passively observed particle trajectories. Based on three-point probabilities and exploiting Onsager's regression hypothesis, the mean back relaxation extracts more information from passively measurements compared to classical observables such as the mean squared displacement. We show that it gives access to the non-equilibrium generating energy and the viscoelastic material properties of a well controlled artificial system, and, surprisingly, also of a variety of living systems. It thus acts as a new marker of non-equilibrium dynamics, a statement based on an astonishing relation between the mean back relaxation and the active mechanical energy. Combining, in a next step, passive fluctuations with the extracted active energy allows to overcome a fundamental barrier in the study of living systems; it gives access to the viscoelastic material properties from passive measurements.

## Main

Any quantitative description of living cells requires detailed knowledge about its mechanical processes, ranging from viscous and elastic local properties to the competition between thermal and active forces. The latter continuously drive any intracellular object, be it an ion, a protein, DNA or even the nucleus. The complex and often randomized nature of active forces acting in living cells makes it hard to dissect active from passive, i.e., thermal components. Such discrimination was up to now only achieved in situations where activity can be tuned, or where the degrees of freedom that break detailed balance can be directly observed, as e.g., in cilia bending modes or by time irreversibility.<sup>6-8</sup> Besides such special situations, the main experimental method to gain the active forces and the viscoelastic material properties deploys an independent measurement of both, the free particle fluctuations and the mechanical response function representing the viscoelastic material properties. While the former is obtained by non-invasive observation of

the erratic particle motion, access to the mechanical properties requires an active force application and the observation of particle motion in response. Comparing the free particle motion with the expected thermal motion predicted by the fluctuation dissipation theorem (FDT),<sup>1,2,9–20</sup> allows then detecting broken detailed balance and the quantification of non-equilibrium contributions, e.g., by defining effective energies. Such direct response measurements, that quantify also the viscoelastic mechanical modulus, were done successfully by optical or magnetic tweezers, AFM and even acoustic forces.<sup>3,21–23</sup> While this approach is well accepted, it suffers from several serious problems. The requirement for a simultaneous measurement of nm precise particle motion paired with active and controlled force application in the pN range demands highly specialized equipment that is presently only accessible for few labs worldwide. Additionally, applying an external force, often acting on in-cooperated external particles, inherently disturbs the system, requiring a stringent line of control measurements and still hampers the explanatory power of the obtained results.

## Mean back relaxation detects detailed balance breakdown

Onsager, in his famous regression hypothesis pointed out that the response function, instead of by applying an external force, may equally be measured in response to a *random* force, a statement which is at the heart of the FDT.<sup>24</sup> However, in living systems, FDT does not hold, and it is difficult to apply this insight. Here we overcome this limitation by introducing a mean back relaxation (MBR) function. In contrast to the mean squared displacement (MSD) which enters the FDT, this function measures the mean particle displacement under the condition that the particle travelled the distance  $d$  in the past time interval of length  $\tau$ . In the spirit of Onsager, preselecting displacements  $d$  plays a similar role as application of a disturbing force (a statement proven for simple models in Material and Methods M 3) and the MBR thus quantifies the response to it. More technically, the MBR relates particle positions at three different times, and thus contains more information than the MSD that relates positions at two times.

We can illustrate the concept of the MBR for an overdamped particle confined in a harmonic potential. A particle that moved in the past time  $\tau$  from the potential minimum a distance  $-d$ , is expected to relax on average back to that minimum (Fig. 1a upper). However, the condition of just having traveled the distance  $-d$  is not bound to trajectories that start at the center of the potential. Another extreme case that fulfills a similar condition is a particle that started at position  $-d$  and moved to the center in time  $\tau$  (Fig. 1a lower). Fluctuating around the center, it will (on average) contribute zero to MBR. Hence, the here introduced mean back relaxation depends on the details of starting and endpoints and the according probabilities. In equilibrium, detailed balance ensures that the joint probability to observe a particle jumping from  $a'$  to  $b'$  (Fig. 1a upper) is exactly the same as jumping from  $b'$  to  $a'$  (Fig. 1a lower) namely  $W_2(a' \rightarrow b') = W_2(b' \rightarrow a')$  (see Material and Methods M 2, eq. 7). But only in the first case, the particle will relax back by traveling a distance  $d$ , hence averaging over both situations gives a mean relaxation of  $d/2$ . As we can separate any possible jump within the potential into such pairs with equal probability but different relaxation path, we intuitively expect that the mean back relaxation tends to a distance that is just half the initial jump distance, as long as thermodynamic equilibrium, namely detailed balance is given.

Example particle trajectories moving in such a harmonic potential can be conveniently obtained using Brownian dynamics simulations (Fig. 1b). The trajectories fulfilling our precondition can be visually selected by shifting a copy of the trajectory by  $d$  and  $-\tau$  (Fig. 1b, gray). The crossing points of original and shifted trajectories are collected and overlaid as initial positions for the MBR curves. As there are few crossing points (Fig. 1b), we increase statistics by using any value of  $d$  (keeping  $\tau$  fixed), and then overlaying the resulting displacements normalized by  $d$ . Fig. 1c shows an overlay of 10,000 such trajectories (light red) and the resulting mean (black). The latter shows a kink at time  $t = 0$ , implying that the particle on average *reverts* the conditioned displacement. As introduced above, this is intuitive as the conditioning selects particles that just moved up in the potential, and thus, for positive times on average relax back down. This intuition may explain the sign of the MBR, but not its magnitude. The particle travels back *half* of its initial drift. This nontrivial ratio of 1/2 can be derived analytically using probability distributions (Material and Methods M 2). In summary, the mean traveled distance as measured in the MBR is finite because of the preselection condition, and

the reason for its sign is the average (back) relaxation of the particle to the potential minimum. Formally, the MBR is defined via the three point joint probability  $W_3(x, t; x', t'; x'', t'')$  of finding the particle at  $x$  at time  $t$  and at  $x'$  and  $x''$  at the earlier times  $t'$  and  $t''$  (Material and Methods M 1).

$$\text{MBR}(t) = \lim_{\tau \rightarrow 0} \int dx dx_0 dd \left( -\frac{x - x_0}{d} \right) W_3(x, t; x_0, 0; x_0 - d, -\tau). \quad (1)$$

The MBR depends on  $W_3$ , and we expect it to contain more information than the MSD, which involves two times only.

Although aiming at understanding the complexity of a living cell (Fig. 1d) we first simplified our analysis to a situation where a particle rests in a local viscoelastic cage, such as a cytoskeletal network. This cage presents a local trap for the particle that is then modeled by a harmonic potential, centered at position  $q$ . Hence, we use the harmonic potential to model the local trapping by the cytoskeleton (Fig. 1d). As introduced above, the particle at position  $x$  performs a random motion with a diffusion constant  $D$ . The active forces as found in living cells can distort the cytoskeletal background (Fig 1d, center), mimicked by moving the harmonic potential also on a random trajectory (Fig. 1d, right) with diffusion constant  $D_q$ , *unaffected* by the particle. Since the movement of the trap is fully controlled by the predefined path, it violates the Einstein relation so that the trap diffusion is neither coupled to the particle friction nor to thermal energy. Hence, this system of two coupled degrees of freedom (particle and trap position) violates detailed balance. If  $x$  and  $q$  are experimentally accessible, the entropy production can be measured. It is time antisymmetric<sup>25</sup> and thus directly quantifies violation of detailed balance and detects non-equilibrium. To mimic an experiment in a living cell where we do not know the distortion of the cytoskeletal background, we pretend to be blind to the trap position, i.e., treat  $q$  as a *hidden* degree of freedom. When studying complex systems, such presence of hidden degrees is the typical case. Then the entropy production cannot easily be measured and detecting non-equilibrium is nontrivial.

What can we learn for this system from conditioned trajectories? During spontaneous fluctuations, random forces push the particle to exited states in the considered potential, from where it will (on average) relax to the potential origin. The MBR thus corresponds to the typical distance between  $x$  and  $q$  under conditioning, and thus partly reveals the properties of the hidden degree of freedom  $q$ . This information is not directly accessible from two point measurements such as the mean squared displacement.

For the given model of particle and diffusing trap, the MBR can be derived analytically, and is found to be (Material and Methods M 4)

$$\text{MBR}(t) = \frac{1}{2} \left( 1 - \frac{D_q}{D} \right) (1 - e^{-\kappa\beta Dt}). \quad (2)$$

Here  $\kappa$  is the spring stiffness of the harmonic potential and  $\beta = (k_B T)^{-1}$ , with thermal energy  $k_B T$ . Astonishingly, and as noted above, the MBR approaches a value of  $\frac{1}{2}$  for the equilibrium case of  $D_q = 0$ . Also worth noting, the value of  $\frac{1}{2}$  can be shown to appear generally for situations in presence of a slowly moving particle background if the dynamics follows *detailed balance*. For non-equilibrium cases, i.e., for finite  $D_q$ , the MBR takes smaller values.

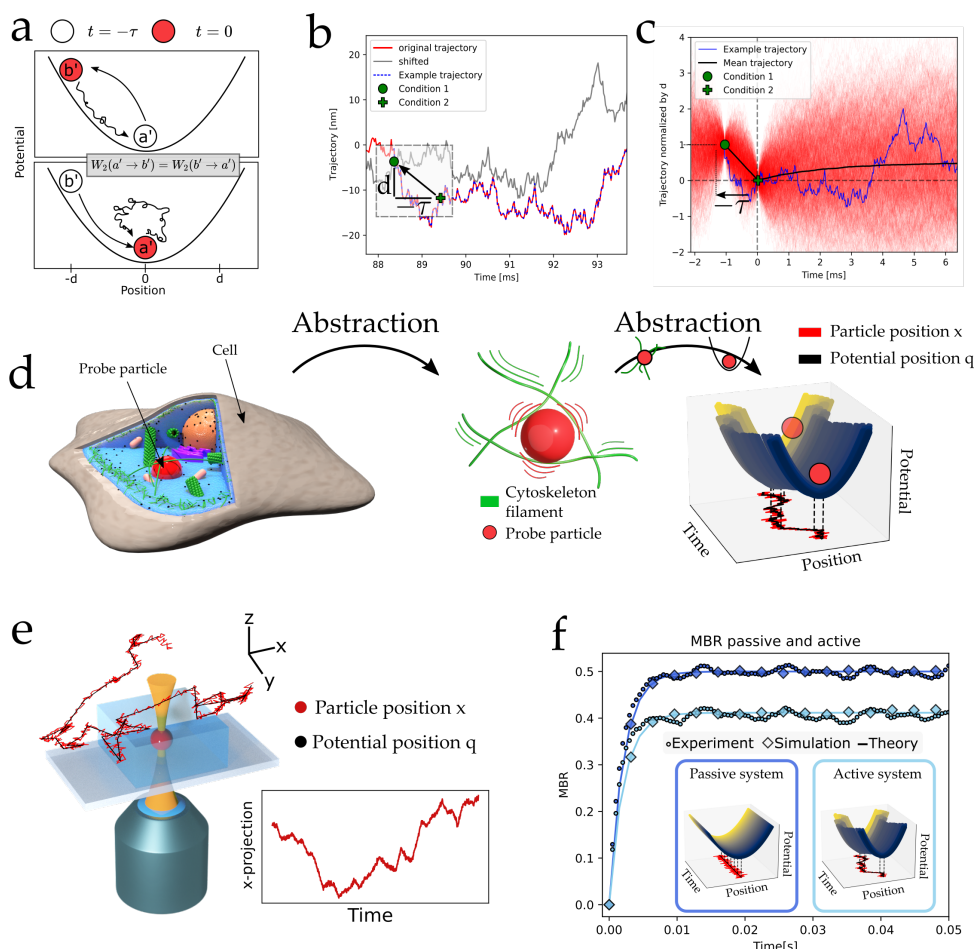

Figure 1: The mean back relaxation (MBR) quantifies a correlation at three different times. a) Schematic of a particle in a harmonic potential. When the particle has moved from equilibrium position to an excited state in time  $\tau$ , it will on average go back to the equilibrium position. Contrary, when it moved from excited state to equilibrium, it will on average stay there in the future. b) The MBR relies on particle trajectories that fulfill the condition of a displacement  $d$  in the history  $\tau$ . This can be visualized by shifting the original trajectory (red) by these parameters (gray). The cross-points mark then trajectories that obey both conditions. c) The average (black) of many (here 10 000, red) such reconditioned trajectories defines the MBR. In blue is the example trajectory from panel a. d) Study of complex cellular material is abstracted by active motion of a harmonic potential. e) Experimental access to the MBR can be achieved via an optical tweezers where the trap is moved to perform a random walk with diffusion coefficient  $D_q$ . The particle trajectory in the moving trap is obtained in the lab frame using a special detection laser (not shown). f) The resulting MBR for a passive ( $D_q = 0$ ) and actively driven particles ( $D_q > 0$ ) shows excellent agreement between the theory, the simulations and the experiment.

## Experimental validation of the MBR's predictive power

The experimental realization of the introduced theoretical model was achieved by trapping a  $1\mu\text{m}$  polystyrene particle in a movable optical tweezers (Fig. 1e, Material and Methods M 6). The particle motion was measured using an additional, fixed, low power detection laser with nm and  $\mu\text{s}$  resolution. Implementing a random trap trajectory with a diffusion constant  $D_q$  enabled us to directly confirm the theory and simulations of the MBR (Fig. 1f, 2a). As predicted, the experimental realization of a passive system with  $D_q = 0$  showed a rapid relaxation of the MBR to the expected value of  $1/2$ . But randomly moving the trap by increasing  $D_q > 0$ , and hence driving the system to a non-equilibrium state, led to a decrease of the MBR and its long time limit (Fig. 2b). To verify experimentally the Onsager regression hypothesis, we checked if the MBR reflects the mechanical properties of the studied system. Indeed, by fitting the time dependent relaxation of the MBR to the theoretical expression we obtained the relative non-equilibrium contribution represented by the trap diffusion  $D_q$  and the mechanical properties of the experimental system represented by the stiffness of the optical trap  $\kappa$  and the friction coefficient  $\gamma$  (Fig. 2a,b). A surge in active driving by an increase of the trap motion confirmed that the MBR can become negative as suggested by Eq. (2) (Fig. 2b). One striking prediction of the MBR is that already its long time limit can be used as a simple way to quantify the active non-equilibrium driving. Again, we find an excellent agreement between the applied active motion, quantified by  $D_q/D$  and the expected MBR value (Fig. 2c), where negative values of the MBR implicate that the motion is dominated by the trap motion, and positive values mark a temperature dominated motion. These results suggest that the MBR allows determining if the system is out of equilibrium, and at the same time quantifying the relative intensity of the active motion (here  $D_q$ ). Hence, we have demonstrated a simple experimental access to the recently introduced active diffusion<sup>26-29</sup> by a simple and noninvasive trajectory analysis.

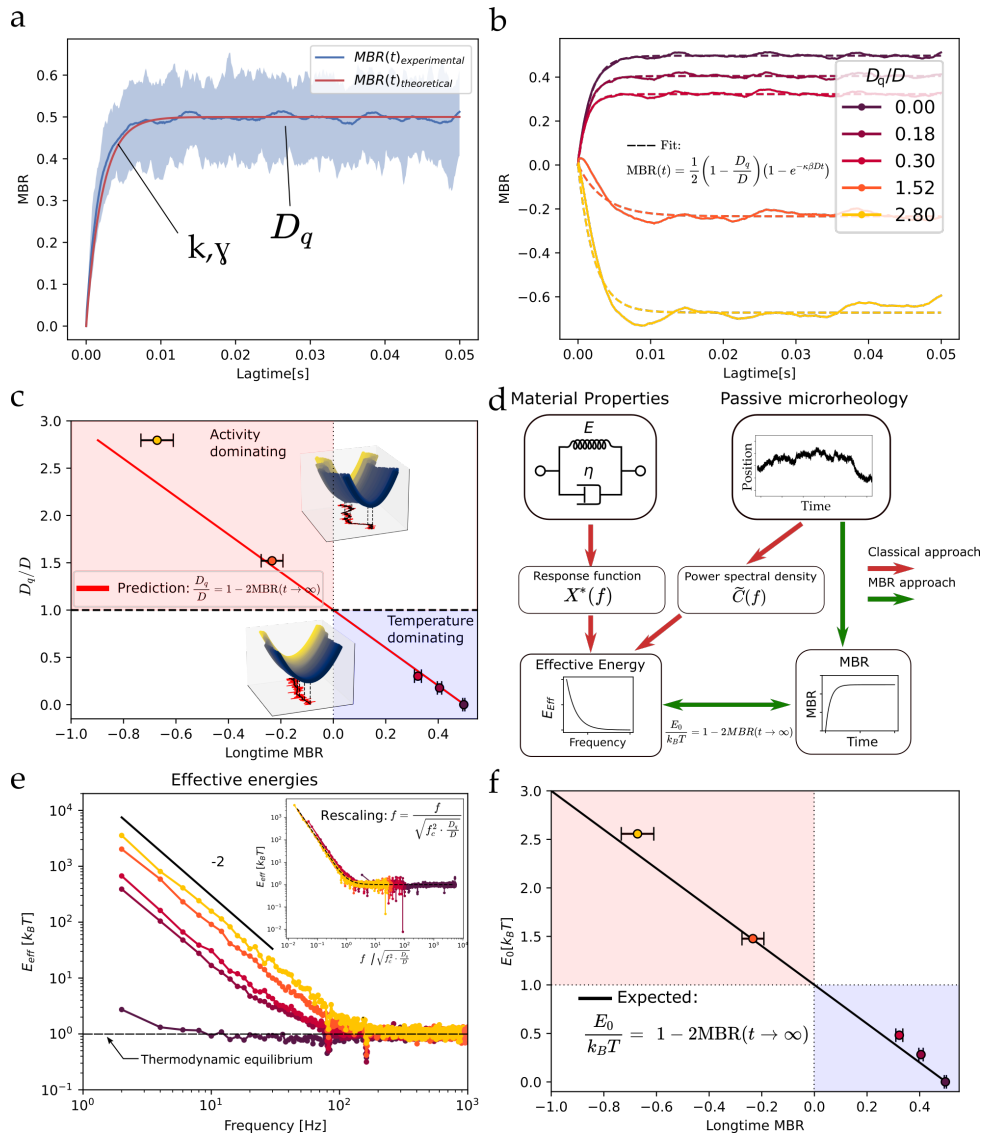

Figure 2: MBR gives access to mechanics and activity. a) Fitting the theoretical model to the MBR data allow extracting the mechanical properties and activity as quantified by the active trap diffusion. b) Increasing the active trap diffusion leads to changes in the long term limit of the MBR. c) Already the long term limit of the MBR allows inferring the relative active diffusion, where a negative value is identified with activity dominating and a positive value means the fluctuations are temperature dominated. d) The effective energy is a common quantity used to determine activity. This can be inferred from measurements of mechanics and spontaneous fluctuations, but also from the MBR. e) Effective energy of the movable trap for different activities  $D_q$ . Inset: Using the theoretical prediction, effective energies can be rescaled to master curve using known values of  $f_c$ ,  $D$  and  $D_q$ . f) The effective energy can be determined from the long time limit of the MBR, similar to the active diffusion

## Measure of activity from passive observation

Considering this important new access to non-equilibrium properties, we wondered if the long time limit of the MBR can also be used to determine another key quantity for a thermodynamic description of active systems, namely the energy that is injected into and dissipated by the system. We quantify it as *effective energy*  $E_{\text{eff}}(f)$  that is defined by comparing the particle fluctuations for a frequency  $f$  with the Brownian motion expected by FDT (Fig. 2d red path). Any excess fluctuations exceeding the Brownian level is attributed to the active processes as illustrated in Fig. 2e (see SI 2 for a definition).<sup>1,3,30</sup> In our system of a randomly moving trap, both, experimentally as well as analytically (SI 2), the effective energy follows  $E_{\text{eff}}(f) = E_0 \left(\frac{f}{f_0}\right)^{-2} + k_B T$  with the frequency  $f_0 = (\kappa D)/(2\pi k_B T)$  in this model. The analytical divergence at  $f \rightarrow 0$ , hence infinite time, is experimentally not reached because we only record traces for 1 second. Astonishingly, the analytical analysis predicts a direct relation between  $E_0$  and the MBR,

$$\frac{E_0}{k_B T} = 1 - 2\text{MBR}(t \rightarrow \infty). \quad (3)$$

which is in perfect agreement with the data (Fig. 2f). Hence, the larger distance between the MBR from  $\frac{1}{2}$ , the larger the amplitude  $E_0$  of the effective energy. While the theoretical approach used here can be extended to a model of several particles, its general validity in other systems is as yet unknown. It however suggests that the MBR may give access to the dissipated energies in other non-equilibrium systems as well (Fig. 2d green).

Analyzing a system with broken detailed balance, we wondered whether additional information may be gained from *time reversed* particle trajectories. However, in this model, the reversed trajectories are statistically *indistinguishable* from the original ones (Material and Methods M 4, Extended data Fig.5). This means, e.g., that MBRs evaluated from reversed or original trajectories are identical, despite detailed balance is broken.

## MBR quantifies active intracellular transport

To test if the MBR can also be used in more complex and realistic environments, we turned to analyzing the erratic motion of particles embedded in living cells, which represents a complicated and highly relevant system. As active, molecular motor generated forces provide the dominant contribution to intracellular particle motion, this system is far from equilibrium. A purely passive measurement of the particle trajectory is thus not expected to provide sufficient information about the mechanical properties or the active contributions, as detailed above.<sup>1,2,31</sup> However, with respect to our findings that the MBR, carrying additional information compared to the MSD, may open the door to quantify active non-equilibrium motion we decided to test its potential in the study of cellular mechanics and activity. To this end, we allowed cervical cancer cells (HeLa) to phagocytose  $1\mu\text{m}$  diameter polystyrene particles which we then used as proxies for intracellular organelles, such as lysosomes as done previously.<sup>3</sup> Using the optical tweezers setup (Fig. 3a, Material and Methods M 5), we can experimentally determine both the spontaneous fluctuation by pure passive observation and then directly access the viscoelastic properties in terms of a response function  $\chi(f)$  (Fig. 3b) and the viscoelastic shear modulus  $G^*(f)$  (Fig. 3c) using active microrheology (AR) (Material and Methods M 7). We have hence direct experimental access to the effective energy (Material and Methods: Eq. (30)) and the mechanical properties which brings us in a perfect position to test the potential of the MBR. The main aim here is to extend a passive microrheology approach to active systems, which has not been possible before.



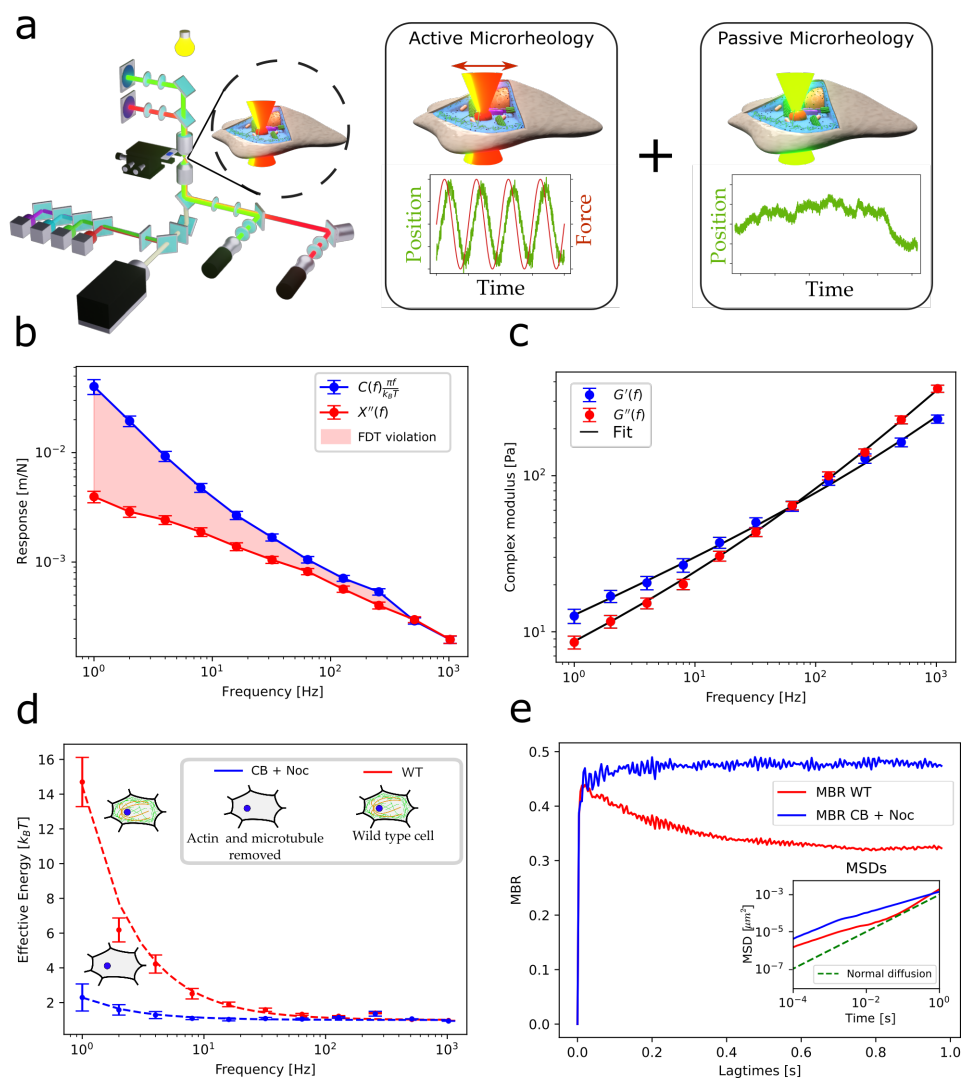

Figure 3: MBR as new quantity to analyse living cells: a) combining a fluorescent microscope with optical tweezers and detection lasers allows simultaneous measurement of the viscoelastic properties, the effective energy and the MBR in living cells. b) Comparing the response expected from the fluctuations and the direct measurements shows violation of the fluctuation dissipation theorem. c) Direct measurement of the response function gives access to the complex shear modulus. d) Comparing the effective energy in WT cells (red) and cells with pharmacologically reduced motor activity (blue) shows a breakdown of effective energy in the druged, and hence passive cells. e) the MBR of passivated cells (blue) gives similar results as a passive, optically trapped particle. In active WT cells, activity is indicated by the deviation of the MBR long term limit from  $1/2$ . Inset) The MSD of the two curves shows superdiffusive behaviour in the WT cells, which is not the case in the passive cells.



## MBR gives access to non-equilibrium energy in cells

To study the different MBR in active and passive cellular systems, we compared the effective energy and the MBR of untreated WT cells with passivated cells. Here the active forces are drastically reduced by the disruption of the actin (Cytochalasin B, CB) and microtubule (Nocodazole, Noc) cytoskeleton on which the molecular motor proteins apply their forces (Material and Methods M 10). As expected, the statistics of particle motions in this depleted cell is similar to an equilibrium system, i.e., the effective energy remains close to  $k_B T$ , while in an intact cell,  $E_{\text{eff}}$  can be much larger than  $k_B T$  for low frequencies (Fig. 3b).

Turning to the MBR now shows the potential power of this new quantity. In the depleted, but still living cells, we found that the predicted long time limit of  $\frac{1}{2}$  is indeed closely approached, demonstrating that this general behaviour can also hold for a complex passive system. We confirm this finding by an analytical derivation of the  $\frac{1}{2}$  MBR long time limit in any time independent potential (Material and Methods M 2). Turning to the MBR of active living cells, we first see an overall different shape of the MBR, as an initial steep increase follows a decay to the long time limit. As seen above for the model system, the MBR converges in the active case to a long time limit smaller than  $\frac{1}{2}$ . The activity can also be confirmed by investigating the MSD (Fig. 3e inset), as in the active cell, the particle motion becomes superdiffusive in the long time limit. This suggests that similar to the actively moving trap system, a long time deviation of the MBR from the equilibrium value  $\frac{1}{2}$  can be used to detect active motion in general.

## MBR allows passive microrheology even in active non-equilibrium systems

This raises the question if the MBR can be used to also quantify activity in living cells. To test this, we measured mechanics and activity in terms of effective energy as well as the MBR of 7 different cell types and conditions ranging from epithelial over cancer, kidney, muscle and immune cells (Extended Data Fig 2, Material and Methods M 9). As these different cell types show variable viscoelastic and active properties, this broad approach allowed exploring the relation between MBR, activity and mechanics in more detail. Consistent with previous experiments,<sup>3</sup> we find that the effective energy in cells can be expressed by a powerlaw model  $E_{\text{eff}} = E_0(f/f_0)^\nu + k_B T$  (Fig. 4a), where the frequency  $f_0$  is set to 1 Hz. While the prefactor  $E_0$ , which quantifies the extend of metabolic energy dissipated in the system, varied drastically between different cells, the powerlaw exponent was found to only vary non-significantly around a value of  $\nu \approx -1$ . To infer a potential relation between the long term limit of the MBR and the effective energy, we inspected  $E_0$  as a function of the MBR long time limit as shown in Fig. 4b. Common state of the art expectation is that it is difficult to quantify activity from passive measurements.<sup>1-3</sup> Keeping in mind that the MBR is inferred from such passive observation, to our great surprise, we found an impressively consistent linear relation between the two quantities. This striking dependence opens the door to experimentally access not only the effective energy that is driving intracellular objects but also to determine the viscoelastic properties inside a cell by simply observing a particle trajectory.

Exploiting these findings, we define an adapted version of the fluctuation dissipation theorem for active systems. This is based on combining the spontaneous fluctuations as quantified by the powerspectral density  $C(f)$  and the analytical expression for the effective energy that are related to the dissipative response function  $\chi''(f)$  (Fig.4 c) via (Material and Methods M 7):

$$\chi''(f) \approx \frac{\pi f C(f)}{(E_0 f_0 / f + k_B T)}, \quad (4)$$

When now comparing the response function that is predicted using  $E_0$  obtained via the MBR (Fig. 4b) with the independently measured response function via active microrheology (AR) (Fig. 4v upper), we found an excellent agreement with an average relative error of 16% (Fig. 4c lower). Using this approach we can successfully solve one of the most hindering problems of modern mechanical biology, as we determine both, the active mechanical energy dissipated, and the mechanical properties defined by the response function of a living cellular system by purely observing

the passive particle motion. This approach is fundamentally different to classical passive microrheology which can only be used in thermodynamic equilibrium and would yield an average relative error of 236% in this situation (Extended Data Fig. 3). Once knowing the dissipation of the system we can either exploit Kramers-Kronig relation, or a typical phenomenological model such as a coupled springpot to directly gain the real and complex part of the viscoelastic shear modulus as shown in (Fig. 4d,e, Material and Methods M 8).<sup>3,23,32</sup> To test the predictive power of our approach, we used the here developed new formalism to analyze a new cell type (MCF7), that was not previously included in the analysis. Impressively, we can compute with very good agreement the independently measured imaginary response function (Fig. 4 f, error 16.3%) and the complex shear modulus (Fig. 4 g, error  $G'$ : 16.8%, error  $G''$ : 15.2%) by only using the passive particle trajectory and the phenomenological laws established above.

## Conclusion

We demonstrate that the new quantity of mean back relaxation allows new insights into non-equilibrium systems, which cannot be given by other known analysis. Our analysis demonstrates the predictive power of the MBR by re-establishing passive microrheology to analyse active cellular systems, which now makes a rapid and detailed local and temporal characterization of the viscoelastic material properties inside cells and active biological system possible. Compared to the current state of the art (Fig. 5), we do not require a combined analysis of active and passive measurements. This has large implications for new models and new theoretical approaches to study one of the most important scientific subjects of our time, actively driven microscopic systems.

Correlating particle positions measured at three different times, like in the MBR, is expected to distinguish equilibrium from nonequilibrium trajectories, as has been shown theoretically for a discrete model.<sup>33</sup> But such idea has not been put forward for continuous (experimental) systems. The MBR introduced here can not only distinguish equilibrium from nonequilibrium systems, it also allows *quantifying* the distance from equilibrium. As detailed in Eq. (13)(Material and Methods M 3) for a general potential, conditioning trajectories for MBR yields a *shifted* particle distribution and has the same effect as application of a short force pulse. Recalling Onsager, the selected trajectories are thus equivalent to a perturbed initial state, and the MBR measures its relaxation. Because this perturbation is given by the ratio of active and thermal energies (Eq. (13)), the MBR allows to quantify active energies from passive measurements. This statement is proven analytically in paradigmatic active models and experimentally observed in a system as complex as a living cell. Future theoretical work can investigate the relation to, e.g., first passage times and higher order moments,<sup>34-36</sup> the concept of biased ensembles<sup>37</sup> or large deviation theory.<sup>38,39</sup>

This opens the door for a new experimental and theoretical access to quantify life from a mechanical point of view.

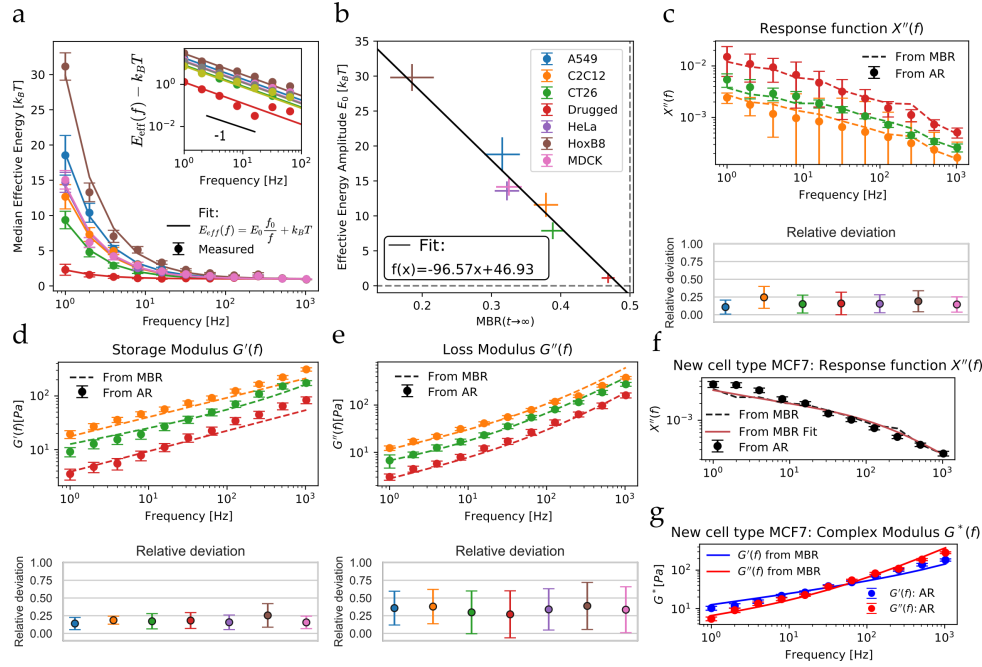

Figure 4: MBR long term limit relates to effective energy in cells via a linear mastercurve. a) Analysing the effective energy of 7 different cellular situations shows powerlaw behaviour. Inset) Detailed analysis shows a general powerlaw exponent of -1. b) Plotting the prefactor of the effective energy  $E_0$  against the long time limit of the MBR (at 1s) shows a linear dependence, where the values for all cells are found on a mastercurve. c) Using the FDT with the correction for the effective energy and the  $E_0$  from the mastercurve allows extracting the dissipative response function purely from passive measurements of the MBR and the power spectral density. The error between the direct measurements and the inference via the MBR is typically smaller than 10%. d,e) Fitting a generally accepted phenomenological model to the dissipative response function allows extracting the real and imaginary part of the shear modulus. Again, the error between the direct measurements and the values inferred from the passive measurements is typically below 16%. f) Applying the method to a new, yet unused cell confirms that the MBR can be used to extract the dissipative response function from a passive measurement of an active system. g) The resulting shear modulus is in excellent agreement with the direct measurements.

### Comparison between classical and new MBR approach

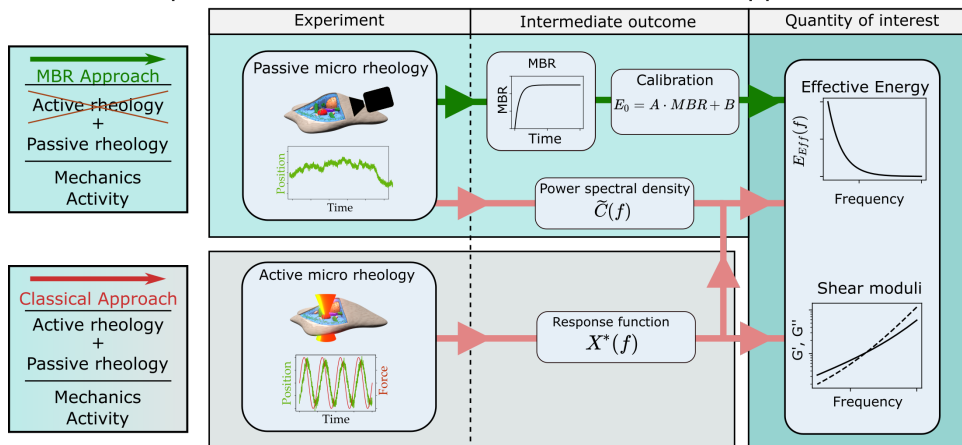

Figure 5: Comparison between the classical approach which relies on a simultaneous access to the freely fluctuating particle trajectories and the optical tweezer based rheology. In contrast the access via the MBR only requires the passive observation of the particle trajectory, and yield eventually the same results as the classical approach.

## Material and Methods

### M 1 Mean back relaxation: Definition

As discussed earlier, the mean squared displacement cannot detect the breaking of detailed balance.<sup>33,40</sup> This is because it is based on the joint probability  $W_2(x, t; x', t')$  of particle position  $x$  at time  $t$  and the earlier position  $x'$  at time  $t'$ . We thus aim to explore an observable based on the *three* point probability. To achieve this consider the mean traveled distance after selecting preconditioned trajectories. A simple and intuitive condition is picking trajectories which traveled a distance  $d$  in the immediate history, i.e., between times  $-\tau$  and zero. We define the *mean back relaxation* (MBR) via

$$\text{MBR}(t) = \lim_{\tau \rightarrow 0} \int dx dx_0 dd \left( -\frac{x - x_0}{d} \right) W_3(x, t; x_0, 0; x_0 - d, -\tau). \quad (5)$$

$W_3(x, t; x', t'; x'', t'')$  is the joint probability of finding the particle at positions  $x, x'$  and  $x''$  at the specified times, with  $t$  and  $\tau$  positive in Eq. (5). For simplicity of discussion we take the limit  $\tau \rightarrow 0$ . In a trap the particle will often move in the opposite direction of our conditioning, because it has to travel back to the center of the trap. So we multiply with a minus sign to obtain a positive result for the MBR in equilibrium. In simple cases the perturbation induced by the conditioning will be linear in  $d$  (see comments below) thus we divide by  $d$  to normalize. When determining the MBR from trajectories, it is useful to introduce a small lower cutoff for  $d$  to avoid division by small numbers. After the integration over all possible displacements  $d$ , the MBR defined in Eq. (5) is a function of correlation time  $t$  only.

### M 2 MBR in static potential, equilibrium

Consider a Brownian particle at position  $x$  trapped in a bound potential  $U(x)$  in equilibrium. The Boltzmann distribution of the particle at time  $-\tau$  thus can be found as

$$P_{\text{eq}}(x_0 - d) = \frac{1}{\mathcal{Z}} e^{-\beta U(x_0 - d)} \quad (6)$$

with the normalization  $\mathcal{Z}$ . For small  $\tau$ , the dynamics of the system is governed by a diffusive dynamics of the system, added by a drift due to the potential gradient.<sup>41</sup> The short time evolution of the joint probability for a travelled distance  $d$  is given by<sup>41</sup> ( $D$  is the particle's diffusion coefficient)

$$W_2(x_0, 0; x_0 - d, -\tau) = \frac{1}{\Omega} e^{-\beta U(x_0 - d)} e^{-\frac{1}{2}\beta U'(x_0 - d)d} e^{-\frac{d^2}{4D\tau}} \quad (7)$$

with normalization  $\Omega$ . For small  $d$  and  $\tau$  we can interpret the expression in the exponent as a Taylor expansion in  $d$  around  $x_0 - d$ . Using the standard chain rule from probability calculus for the conditioned probability,  $P(x_0|d) = \frac{W_2(x_0, 0; x_0 - d, -\tau)}{P(d)}$ , with  $P(d) = \int dx_0 W_2(x_0, 0; x_0 - d, -\tau)$ ,

$$\lim_{d, \tau \rightarrow 0} P(x_0|d) = P_{\text{eq}}\left(x_0 - \frac{1}{2}d\right) \quad (8)$$

Under the condition of a displacement  $d$  in the future period  $\tau$ , the distribution equals the original one shifted by  $\frac{1}{2}d$ .

For long times  $t$ , we have

$$W_3(x, t \rightarrow \infty; x_0, 0; x_0 - d, -\tau) = P_{\text{eq}}(x) W_2(x_0, 0; x_0 - d, -\tau). \quad (9)$$

Using this in Eq. (5) yields a long time MBR of  $\frac{1}{2}$ .<sup>1</sup> This can be understood from the fact that the long time MBR measures the distance between the mean directly after the conditioning and the equilibrium value. Notably, the long time value of  $1/2$  is universally found for a bound potential in equilibrium. However, this is only a statement on the long time limit, the time evolution of the MBR(t) for  $t > 0$  still depends on the properties of the potential.

To illustrate this we regard a Brownian particle in a harmonic potential  $U(x) = \frac{1}{2}\kappa x^2$  with diffusion  $D$ . The MBR of this system can be found as

$$\text{MBR}(t) = \frac{1}{2} (1 - e^{-\beta D \kappa t}). \quad (10)$$

It is positive for all times  $t$  and approaches the long time value of  $\frac{1}{2}$  which is independent of the dynamical properties of the system as expected. The relaxation is governed by the timescale  $\beta D \kappa$ , depending on system specific parameters as expected.

### M 3 MBR for static potential, non-equilibrium distribution

How do these findings change for a system in non-equilibrium? We aim to gain understanding by assuming the system to obey a Boltzmann weight with an effective energy introduced in the main text,

$$P(x_0 - d) = \frac{1}{\mathcal{Z}} e^{-\beta_{\text{eff}} U(x_0 - d)}. \quad (11)$$

<sup>1</sup>Note that limit of  $d \rightarrow 0$  of Eq. (8) is automatically fulfilled in Eq. (5) in the limit of small  $\tau$ , as the distribution in Eq. (7) gets sharp in  $d$  due to the term  $\exp(-d^2/4D\tau)$ .

Such non-equilibrium distribution may for example be realized in a simple motor model as exemplified below. This assumption breaks detailed balance, if the short time motion of Eq. (7) is governed by the true bath temperature, so that here,

$$W_2(x_0, 0; x_0 - d, -\tau) = \frac{1}{\Omega} e^{-\beta_{\text{eff}} U(x_0 - d)} e^{-\frac{1}{2} \beta U'(x_0 - d) d} e^{-\frac{d^2}{4D\tau}}. \quad (12)$$

This then leads to a conditioned distribution for the position  $x$  at time  $t = -\tau$ ,

$$\lim_{d, \tau \rightarrow 0} P(x_0 | d) = P\left(x_0 - \frac{d}{2} + \frac{d}{2} \left[ \frac{\beta}{\beta_{\text{eff}}} - 1 \right]\right) \quad (13)$$

Notably, this distribution is exactly equal to the one obtained when applying a force pulse of length  $\tau$  and magnitude  $\frac{d}{2D\tau\beta_{\text{eff}}} - \frac{d}{D\tau\beta}$ , i.e., directly related to the active energy.

From this, and factorizing  $W_3$  as in Eq. (9), we find the long time value of the MBR,

$$\text{MBR}(t \rightarrow \infty) = \frac{1}{2} - \frac{1}{2} \left[ \frac{\beta}{\beta_{\text{eff}}} - 1 \right] \quad (14)$$

This equation shows that the deviation of the long time value of the MBR is directly related to the deviation of  $\beta_{\text{eff}}$  from  $\beta$ . Using, as in the main text,  $\beta_{\text{eff}}^{-1} = k_B T + E_0$ , we obtain

$$\frac{E_0}{k_B T} = 1 - 2\text{MBR}(t \rightarrow \infty). \quad (15)$$

## M 4 MBR for diffusing potential model

The diffusing potential introduced in the main text is an application of the above discussion and Eq. (14).

A Brownian particle is in a harmonic potential, but we model the potential minimum  $q$  of as a diffusive variable as well. Because the movement of  $q$  is not influenced by the movement of the particle, it effectively acts as an active motor, which is insensitive to the particle at  $x$ . The Langevin equations of this system are

$$\dot{x} = -\beta D \kappa(x - q) + f_x \quad (16a)$$

$$\dot{q} = f_q, \quad (16b)$$

with the independent white noise forces  $f_x$  and  $f_q$  following the well known fluctuations dissipation theorem with the respective diffusivities given by  $\langle f_x(t) f_x(t') \rangle = 2D\delta(t - t')$  and  $\langle f_q(t) f_q(t') \rangle = 2D_q\delta(t - t')$ . For this model, we can use the analytical extension mentioned above. It is useful to focus on the relative coordinate  $x - q$  to obtain the stationary distribution of the system,

$$P(x - q) = \frac{1}{\mathcal{Z}} e^{-\beta \frac{D}{D+D_q} U(x-q)} \quad (17)$$

We can therefore identify  $\beta_{\text{eff}} = \beta \frac{D}{D+D_q}$  from Eq. (14). Indeed, realizing that the short time motion of the particle is governed by its bare diffusion coefficient  $D$ , and hence the true bath temperature, Eq. (14), applies here. This model is thus an example of the above concepts, showing that Eq. (14) applies to a wider range of cases. Using the solution of the Brownian particle in a harmonic potential, we finally have the MBR of this model for any time  $t$ ,

$$\text{MBR}(t) = \frac{1}{2} \left( 1 - \frac{D_q}{D} \right) (1 - e^{-\kappa\beta Dt}). \quad (18)$$

This relation is discussed and verified in the main text. Notably, the finite diffusivity of  $q$  is predicted to change only the overall prefactor of the MBR, however in a drastic manner: In contrast to the equilibrium system at  $D_q = 0$ , it deviates from  $\frac{1}{2}$  and can take *negative* values.

A remark on measuring time reversal symmetry for the diffusing potential. If  $x$  and  $q$  are (experimentally) accessible, an obvious measure is the entropy production of the system, i.e., the work of the motor particle  $\int \kappa(x(t) - q(t))\dot{q}(t)dt$ . However, when only the particle position  $x$  is known, entropy production cannot be measured. Furthermore, it is insightful to regard the time reversed dynamics of the motor model,

$$\dot{x}(-t) = \beta Dk(x(-t) - q(-t)) - f_x(-t) \quad (19a)$$

$$\dot{q}(-t) = -f_q(-t). \quad (19b)$$

By formally solving the forward dynamics  $x_f$  in Eq. (16) and comparing to the solution of the backward dynamics  $x_b$  via Eq. (19) we get

$$x_f(t) = (x_0 - q_0)e^{-\beta Dkt} + q_0 + \int_0^t ds e^{-\beta Dk(t-s)} \left[ f_x(s) + \int_0^s \beta Dk f_q(u) du \right] \quad (20)$$

$$x_b(-t) = (x_0 - q_0)e^{-\beta Dkt} + q_0 + \int_0^{-t} ds e^{\beta Dk(-t-s)} \left[ -f_x(s) + \int_0^s \beta Dk f_q(u) du \right] \quad (21)$$

$$= (x_0 - q_0)e^{-\beta Dkt} + q_0 + \int_0^t ds e^{-\beta Dk(t-s)} \left[ f_x(s) + \int_0^s \beta Dk f_q(u) du \right] \quad (22)$$

In the last step we mapped  $s \rightarrow -s$  and  $u \rightarrow -u$ , using  $f_x(-s) = f_x(s)$  and  $f_q(-s) = f_q(s)$ . So we find that the dynamics in forward and backward time-direction of the dynamics of the particle are *statistically identical*. This proves the statement given in the main text, that the MBR evaluated from backward trajectories is identical to the one from forward trajectories for the diffusing potential.

## M 5 Optical tweezers setup

The optical tweezers setup (Extended Data Fig 4) is based on 2 diode lasers which are used for trapping and position detection of the particles respectively. An 808 nm, 250 mW laser (LU0808M250, 808 nm, 250 mW Lumics GmbH, Berlin, Germany), ensuring minimal laser absorption in biological tissue,<sup>42</sup> is used to trap the particles and for measurement of the forces exerted to these particles. The collimated laser beam is expanded by a 5x telescope setup to slightly overfill the back aperture of the objective. The trapping laser can be steered by an extra thin mirror (diameter 12.7  $\mu\text{m}$  x thickness 1 mm custom build, Chroma, Bellows Falls, USA) glued onto a piezo tilting platform (S-331, Physik Instrumente (PI) GmbH & Co. KG, Karlsruhe, Germany). Using a 4f configuration, the plane of the piezo rotation mirror is projected onto the back aperture of the objective, allowing trap positioning while optimal entering the objective.<sup>43</sup> The high NA objective (CFI Plan Apochromat VC 60XC WI NA 1.2, Nikon) focuses the beam to a diffraction limited spot in the sample plane. Sample position can be manipulated with a piezo stage (MAX311D/M, Thorlabs, New Jersey, USA) of 20  $\mu\text{m}$  fine travel distance. A 1.4 NA condenser (extracted from Deimus T-10i, Impetux, Barcelona, Spain) is ensuring that almost all of the persistent light is collected and can be used for accurate force detection. The back focal plane



(BFP) of the condenser is then imaged onto a Position Sensitive Detector (order nr. 5000011, First Sensor, Berlin, Germany), where, given correct alignment, the trapping force can be detected. This approach does not require daily calibration, and the correct force measurement was critically crosschecked using the drag force method. A more detailed description of the force detection method can be found elsewhere.<sup>44</sup> Position detection was achieved using back focal plane interferometry.<sup>45</sup> A 976 nm (BL976-PAG500, 976 nm, 500 mW, Thorlabs, New Jersey, USA) IR laser is first expanded by a factor of 3 and then reduced in intensity by a neutral density filter (0.1% transmission, NE530B, Thorlabs, New Jersey, USA). This allows stable laser operation at high diode driver currents, while the laser power at the sample plane is in the order of a few mW. Next, the beam is coupled into the optical path via a dichroic mirror (DM) (DMLP900, Thorlabs, New Jersey, USA). Above the condenser both beams are again separated from the illumination path. A 785 nm notch beam splitter (F78-785, AHF Analysetechnik AG, Tübingen, Germany) is used to reflect the 808 nm trapping laser on the force detector, while letting the illumination light and the 976 nm position detection laser light pass. Then the 976 nm laser is reflected on the force detector using a 650 nm short pass dichroic mirror (DMSP650R, Thorlabs, New Jersey, USA). The BFP of the condenser is imaged onto a Quadrant photo diode (QPD, PDQ80A, Thorlabs, New Jersey, USA) where a signal proportional to the particle displacement can be measured. An aperture is located in front of the QPD in order to allow axial position detection.

Brightfield illumination is achieved using a 620 nm LED ( SOLIS-620D, Thorlabs, New Jersey, USA). The imaging beam is decoupled from the beam path using a 775 nm short pass dichroic mirror (ZT775sp-2P, Chroma, Bellows Falls, USA). Using a tube lens (TTL200-UVB, Thorlabs, New Jersey, USA) the object plane is finally projected onto the camera (ORCA FLASH4.0 V3 QE80, Hamamatsu Photonics, Japan).

The setup was further extended for fluorescence microscopy. A 4-Wavelength LED Source (LED4D255: 405/490/565/660 nm, Thorlabs, New Jersey, USA) is coupled into the beam path using a 4 band beam splitter (ZT405/488/561/647rpc, Chroma Technology, Bellows Falls, USA) which reflects the excitation wave length and transmits emission and bright field light.

In order to keep the sample at a constant temperature of 37°C both, objective and condenser can be heated with an objective heating system (H401-T-Controller, Objective Heater, Okolab, Pozzuoli, Italy).

## M 6 Experimental realization of the diffusing potential

To experimentally realize a driven harmonic potential in a viscous fluid, we employed the optical tweezers setup described afore. Probe particles (Polybead<sup>®</sup> Microspheres 1  $\mu\text{m}$ , Polyscience, Inc) were suspended in 60% Glycerol (ROTIPURAN<sup>®</sup>, Roth) at a dilution of 1:10000 and then inserted to the probe chamber. The probe chamber consists of 2 cover slips (22x55x0.15 mm<sup>3</sup> VWR) glued together with double sided tape (DST1950, Thorlabs, New Jersey, USA) at both ends to create a chamber of 200  $\mu\text{m}$  height. To mimic the harmonic potential, the 808 nm optical tweezers laser was focused onto a probe particle and thereby, for small particle displacements, trapping it in a harmonic potential.

To realize different kinds of activity, a voltage signal representing a discrete random walk was applied to the x-axis of the piezo mirror controlling the position of the trapping laser. The signal  $V(t)$  is given by:  $V(t) = V(t - \Delta t) + V_0(\sigma_T)$  where  $V_0(\sigma_T)$  is randomly drawn from normal distribution with variance  $\sigma_T^2$ . For all experiments,  $\Delta t$  was chosen as 1 ms and  $\sigma_T$  controlled the level of activity. For each experiment, the feedback signal of the mirror was monitored and translated into a laser displacement signal using a previously obtained calibration curve. To determine the trap diffusion coefficient  $D_q$  with highest accuracy, the laser displacement signal was used to calculate the mean square displacement (MSD) from which  $D_q$  was derived according to  $\text{MSD}(t) = 2D_q t$ .

During experiments, a second laser was used to monitor the particle position. This laser was operating at a very low power and did not apply any relevant additional forces to the probe particle. In order to measure the trap stiffness  $k$  of the optical tweezers and the viscosity  $\eta$  of the Glycerol dilution, the particle position was monitored while the harmonic potential was stationary. The trap stiffness  $k$  was obtained from the variance  $\sigma_F^2$  by usage of equipartition theorem

$k = k_B T / \sigma_F^2$ . From the short time MSD of the particle position signal, we obtained the diffusion constant  $D$  and thus also the viscosity  $\eta$  via  $D = k_B T / (6\pi\eta R)$  with particle radius  $R=0.5 \mu\text{m}$  given.

For each activity level of the trap  $D_q \in \{0, 0.18, 0.3, 1.52, 2.8\}$ , 100 different trajectories were recorded, each containing 1 second of measurement. Trajectories were recorded at a sampling rate of 65 536 Hz.

As the particle position is determined by the deflection of the stationary position detection laser, particle displacement can only be measured correctly in a small area where laser deflection is proportional to bead displacement. In this experiment, the distance is limited to  $d_{max} = \pm 200 \text{ nm}$ . For  $D_q > 0$  the particle will quickly leave this detection area, rendering the experiment impractical. To overcome this limitation we generate the trap trajectories prior to the experiment. Iterating through the trajectory, each time a position  $x(t_i) = \pm d_{max}$  is reached at a time  $t_i$ , the left over trajectory is mirrored at this boundary according to

$$x(t > t_i)_{folded} = x(t_i) - (x(t > t_i) - x(t_i)). \quad (23)$$

In this manner, the entire trajectory is folded into the area between  $-d_{max}$  and  $d_{max}$  where accurate position detection is possible. After the particle trajectory was measured, it was unfolded in the same manner to recover the intended active motion (Extended Data Fig. 1). Since the motion is generated from a fully random underlying process, and the relaxation timescale is much shorter than the switching timescale, no systematic effect of this approach is to be expected.

## M 7 Active and passive microrheology in living cells

For active and passive microrheology, the previously described optical tweezers setup was used. Cells were prepared according to Material and Methods M 9 and mounted onto the setup. During experiments, cells were kept at  $37^\circ\text{C}$  to ensure physiological conditions.

For each cell type or condition at least  $N=60$  cells were investigated on  $n=3$  subsequent days. Data points were recorded at a sampling rate of 65 536 Hz

### Active microrheology

In active microrheology, the trapping laser is oscillating with a variable driving frequency  $f_D$  and thereby applying a sinusoidal force  $F(t)$  onto a probe particle inside of a cell. Simultaneously, the second position detection laser is recording the particle position  $x(t)$ . For such a measurement, particle position and force are linked via the response function  $\chi(t)$ :

$$x(t) = \int_{-\infty}^t \chi(t-t') F(t') dt'. \quad (24)$$

In Fourier space, this convolution can be evaluated as a product which yields access to the response function,

$$\chi(f) = \frac{\tilde{x}(f)}{\tilde{F}(f)}. \quad (25)$$

which characterizes the viscoelastic properties of the probed area. To capture the full frequency dependent response function, the probe particle is driven successively at different driving frequencies ( $f_D \in \{1\text{Hz}, 2\text{Hz}, 4\text{Hz}, 8\text{Hz}, 16\text{Hz}, 32\text{Hz}, 64\text{Hz}, 128\text{Hz}, 256\text{Hz}, 512\text{Hz}, 1024\text{Hz}\}$ ). For each frequency at least 3 periods were recorded up to a maximum time of 1 second. Using the equilibrium part of the generalized Stokes-Einstein relation<sup>46</sup>

$$G^*(f) = \frac{1}{6\pi R\chi(f)}, \quad (26)$$

with  $R$  being the particle radius, we determine the complex shear modulus  $G^*(f)$ .

### Passive fluctuation measurements

Passive fluctuations measurements have been used to acquire passive microrheology in system with only thermal fluctuations. To determine the MBR, a precise access to particle fluctuations by pure passive observation provides the basic measurement. Here we monitor the probe particle motion in absence of any optical tweezers forces. This is done using solely the position detection laser. For each cell, the position signal was recorded 3 times over a period of 10 seconds. This measurement is then used to calculate the mean back relaxation but also to determine the the power spectral density  $\tilde{C}(f)$  which give access to the activity of the system.

In thermal equilibrium, particle fluctuations in terms of the power spectral density

$$\tilde{C}(f) = |\tilde{x}(f)|^2 \quad (27)$$

are directly linked to the dissipative part of the response function (measured with active micro rheology (AR))  $\chi''(f)$  via the thermal energy:

$$\tilde{C}(f) = \frac{k_B T \chi''(f)}{\pi f} \quad (28)$$

In active systems, like cells, additional metabolic energy is provided to the system. Therefore thermal energy ( $k_B T$ ) is not sufficient to describe the particle motion  $\tilde{C}(f)$ . We introduce an effective energy  $E_{\text{eff}}$  which compensates for this additional active energy  $E_a$ :

$$E_{\text{eff}}(f) = E_a(f) + k_B T \quad (29)$$

In active systems, the effective energy is then given as

$$E_{\text{eff}}(f) = \frac{\pi f \tilde{C}(f)}{\chi''(f)}. \quad (30)$$

A deviation from  $1k_B T$  of this effective energy indicates non-equilibrium properties of the system. In this adapted version of the FDT that is extended to non-equilibrium situations, it is possible to determine the dissipative response function if both the power spectral density and the effective energy are known.

## M 8 Data analysis and statistics

### Motor model

For each level of activity  $D_q$ , 100 particle trajectories were recorded with each period being 1 second. Subsequently, the MBR was calculated. The presented data shows the mean plus/minus standard deviation.

| Cell type       | N  | n |
|-----------------|----|---|
| A549            | 62 | 3 |
| C2C12           | 57 | 3 |
| CT26            | 64 | 3 |
| HeLa            | 79 | 6 |
| HeLa passivated | 25 | 3 |
| HoxB8           | 61 | 4 |
| MCF7            | 61 | 3 |
| MDCK            | 65 | 3 |

Table 1: Amount of experiments per cell type or condition. N is the total number of investigated cells. n is the number of independent experimental days.

Effective energies were calculated as the ratio of the mean experimentally determined power spectral density  $\tilde{C}_{exp}$  (see SI 1) and the theoretically expected PSD of a passive system  $\tilde{C}_{pas}$  with measured values of stiffness  $k$  and friction coefficient  $\gamma$ :

$$\frac{E_{\text{eff}}(f)}{k_B T} = \frac{\tilde{C}_{exp}(f)}{\tilde{C}_{pas}(f)} \quad (31)$$

Here we use that in passive systems the fluctuation dissipation theorem holds true:  $1/\tilde{C}_{pas}(f) = \pi f / (k_B T \chi''(f))$ .

### Active cells

For each cell type or condition, N individual cells were investigated in total on n subsequent days: The results shown for effective energy  $E_{\text{eff}}$ , response function  $\chi$ , power spectral density  $\tilde{C}$  and complex shear modulus  $G^*$  are given as median and standard error of the mean (SEM) if not stated otherwise.

### Deriving the complex shear modulus from the long time MBR limit

To get the phenomenological relation between MBR and effective energy amplitude  $E_0$ , the MBR longtime value (MBR(1s)) of all investigated cell types was plotted against the corresponding amplitude  $E_0$ .  $E_0$  was obtained by fitting the median effective energy with the function  $E_{eff}(f) = E_0 \cdot \frac{f_0}{f} + k_B T$ . Here  $f_0$  is fixed to 1Hz, to keep the units consistent. A linear fit of this data yields a phenomenological relation between long time MBR limit and effective energy prefactor  $E_0$  (Fig. 4b) for all measured cells:

$$\frac{E_0}{k_B T} = -96.575 \cdot \text{MBR}(1s) + 46.93 \quad (32)$$

This relation could then be used to derive the effective energy from the MBR of any new cell type. To test this statement we applied it to MCF7 cells, a new cell type that was not used to derive the relation between  $E_0$  and MBR. Using Eq. 32, the effective energy amplitude  $E_0$ , and with this also the full effective energy spectrum  $E_{\text{eff}}(f)$ , was predicted from the purely passive measurement of the MBR. Additionally, the same passive measurement gives access to the power spectral density  $\tilde{C}(f)$ . With the knowledge of  $E_{\text{eff}}(f)$  and  $\tilde{C}(f)$ , we can exploit Eq. 30 to obtain the imaginary part of the response function  $\chi''(f)$ . As the imaginary and real part of the response function are not independent, knowledge of the imaginary response function is sufficient to fully obtain the viscoelastic material properties. To recover the real

part, either the Kramers Kronig relation can be used, or a model can be fit to the data. As it was shown in a series of recent studies that the complex shear modulus  $G^*(f)$  is well described by a double power law,<sup>3,23</sup> we use this model to model the mechanics of the cell.:

$$G^*(f) = A \cdot (i2\pi f)^\alpha + B \cdot (i2\pi f)^\beta. \quad (33)$$

Using the relation  $G^*(f) = 1/(6\pi R\chi(f))$  we find an analytic expression for  $\chi''(f)$  as

$$\chi''(f) = -\frac{1}{6\pi R} \frac{A(2\pi f)^\alpha \sin \frac{\pi\alpha}{2} + B(2\pi f)^\beta \sin \frac{\pi\beta}{2}}{A^2(2\pi f)^{2\alpha} + B^2(2\pi f)^{2\beta} + 2AB(2\pi f)^{\alpha+\beta} \cos \frac{\pi}{2}(\alpha - \beta)} \quad (34)$$

which is taken to fit the parameters  $A$ ,  $\alpha$ ,  $B$  and  $\beta$ , that then fully describe the viscoelastic shear modulus  $G^*(f)$ . As presented in figure 4 c,d,e, we can now quantify the deviation between  $\chi''(f)$ ,  $G'(f)$  and  $G''(f)$  obtained from established active microrheology (AR) and from the new MBR approach. The relative deviation  $R$  is defined as:

$$R = \sum_i^N \frac{1}{N} \left| 1 - \frac{x_{\text{MBR}}(f_i)}{x_{\text{AP}}(f_i)} \right| \quad (35)$$

, where  $x_{\text{MBR}}(f)$  is the value of a quantity of interest at frequency  $f$ .

## M 9 Cell culture and bead insertion

A549, C2C12, CT26, HeLa and MDCK cells were cultured at 5% CO<sub>2</sub> and 37°C in Dulbecco's modified Eagle medium (DMEM, Capricorn) with 1% Penicillin Streptomycin (Gibco) and 10% fetal bovine serum (FBS, Sigma-Aldrich). HoxB8 cells were provided by the Institute for Immunology, University of Münster, Germany and cultured according to.<sup>47</sup> 3 days before the experiment, HoxB8 cells were suspended in differentiation medium for differentiation into macrophages by the time of experiment. Except for the culture medium and using EDTA instead of Trypsin, the following procedure was the same for HoxB8 cells.

Before experiments, the cells were split close to full confluency and seeded on Fibronectin-coated glass cover slips (22x55x0.15 mm VWR). Previously 1 µm beads (Polybead<sup>®</sup> Microspheres 1 µm, Polyscience, Inc) were added in 1:10,000 dilution to the medium. After this, cells were incubated for up to 15 hours until a sufficient amount of beads was phagocytosed by the cells. Cells were then washed with PBS in order to remove the left over beads outside the cells. After aspiration of PBS, a smaller cover slip was glued on top of the estimated cell spreading area using 2 layers of 200 µm adhesive tape (DST1950, Thorlabs, New Jersey, USA). The sample chamber was filled with CO<sub>2</sub> independent medium (CO<sub>2</sub> Independent Medium, Gibco<sup>™</sup>) in order to provide a healthy environment for the cells during the experiments.

## M 10 Pharmacological treatment

Cytochalasin B (CB) and Nocodazol (Noc) were purchased from Sigma-Aldrich. Both drugs were used at a concentration of 10 µg mL<sup>-1</sup> and added to the medium 10 minutes prior to the experiment.

## References

- [1] H. Turlier, D. A. Fedosov, B. Audoly, T. Auth, N. S. Gov, C. Sykes, J.-F. Joanny, G. Gompper, and T. Betz, "Equilibrium physics breakdown reveals the active nature of red blood cell flickering," *Nature Physics*, vol. 12, pp. 513-519, May 2016.

- [2] M. Guo, A. J. Ehrlicher, M. H. Jensen, M. Renz, J. R. Moore, R. D. Goldman, J. Lippincott-Schwartz, F. C. MacKintosh, and D. A. Weitz, “Probing the stochastic, motor-driven properties of the cytoplasm using force spectrum microscopy,” *Cell*, vol. 158, no. 4, pp. 822–832, 2014. Publisher: Elsevier.
- [3] S. Hurst, B. E. Vos, M. Brandt, and T. Betz, “Intracellular softening and increased viscoelastic fluidity during division,” *Nature Physics*, vol. 17, pp. 1270–1276, Nov. 2021.
- [4] X. Fang and J. Wang, “Nonequilibrium Thermodynamics in Cell Biology: Extending Equilibrium Formalism to Cover Living Systems,” *Annual Review of Biophysics*, vol. 49, pp. 227–246, May 2020.
- [5] C. P. Brangwynne, G. H. Koenderink, F. C. MacKintosh, and D. A. Weitz, “Intracellular transport by active diffusion,” vol. 19, no. 9, pp. 423–427.
- [6] C. Battle, C. P. Broedersz, N. Fakhri, V. F. Geyer, J. Howard, C. F. Schmidt, and F. C. MacKintosh, “Broken detailed balance at mesoscopic scales in active biological systems,” *Science*, vol. 352, no. 6285, pp. 604–607, 2016.
- [7] J. Li, J. M. Horowitz, T. R. Gingrich, and N. Fakhri, “Quantifying dissipation using fluctuating currents,” *Nature Communications*, vol. 10, p. 1666, Apr. 2019. Number: 1 Publisher: Nature Publishing Group.
- [8] T. H. Tan, G. A. Watson, Y.-C. Chao, J. Li, T. R. Gingrich, J. M. Horowitz, and N. Fakhri, “Scale-dependent irreversibility in living matter,” *arXiv:2107.05701 [cond-mat, physics:physics]*, July 2021. arXiv: 2107.05701.
- [9] G. S. Agarwal *Z. Physik*, p. 25, 1972.
- [10] U. Seifert, “Stochastic thermodynamics, fluctuation theorems and molecular machines,” *Rep. Prog. Phys.*, vol. 75, no. 12, p. 126001, 2012.
- [11] D. Ruelle *Phys. Lett. A*, vol. 245, pp. 220–224, 1998.
- [12] T. Harada and S.-I. Sasa, “Equality connecting energy dissipation with a violation of the fluctuation-response relation,” *Phys. Rev. Lett.*, vol. 95, p. 130602, Sep 2005.
- [13] T. Speck and U. Seifert, “Restoring a fluctuation-dissipation theorem in a nonequilibrium steady state,” *Europhys. Lett.*, vol. 74, no. 3, p. 391, 2006.
- [14] V. Blickle, T. Speck, C. Lutz, U. Seifert, and C. Bechinger, “Einstein relation generalized to nonequilibrium,” *Phys. Rev. Lett.*, vol. 98, p. 210601, May 2007.
- [15] R. Chetrite, G. Falkovich, and K. Gawędzki, “Fluctuation relations in simple examples of non-equilibrium steady states,” *J. Stat. Mech.: Theory and Experiment*, vol. 2008, no. 08, p. P08005, 2008.
- [16] M. Baiesi, C. Maes, and B. Wynants, “Fluctuations and response of nonequilibrium states,” *Phys. Rev. Lett.*, vol. 103, p. 010602, 2009.
- [17] J. Prost, J.-F. Joanny, and J. M. R. Parrondo, “Generalized fluctuation-dissipation theorem for steady-state systems,” *Phys. Rev. Lett.*, vol. 103, p. 090601, Aug 2009.
- [18] M. Krüger and M. Fuchs, “Fluctuation dissipation relations in stationary states of interacting Brownian particles under shear,” *Phys. Rev. Lett.*, vol. 102, p. 135701, 2009.
- [19] P. Martin, A. J. Hudspeth, and F. Julicher, “Comparison of a hair bundle’s spontaneous oscillations with its response to mechanical stimulation reveals the underlying active process,” *Proceedings of the National Academy of Sciences of the United States of America*, vol. 98, no. 25, pp. 14380–5, 2001.

- [20] D. Mizuno, C. Tardin, C. F. Schmidt, and F. C. Mackintosh, “Nonequilibrium mechanics of active cytoskeletal networks,” *Science (New York, N.Y.)*, vol. 315, no. 5810, pp. 370–3, 2007.
- [21] R. E. Mahaffy, C. K. Shih, F. C. MacKintosh, and J. Käs, “Scanning Probe-Based Frequency-Dependent Microrheology of Polymer Gels and Biological Cells,” *Physical Review Letters*, vol. 85, pp. 880–883, July 2000. Publisher: American Physical Society.
- [22] M. Puig-De-Morales, M. Grabulosa, J. Alcaraz, J. Mullol, G. N. Maksym, J. J. Fredberg, and D. Navajas, “Measurement of cell microrheology by magnetic twisting cytometry with frequency domain demodulation,” *Journal of Applied Physiology*, vol. 91, pp. 1152–1159, Sept. 2001. Publisher: American Physiological Society.
- [23] A. Nguyen, M. Brandt, T. M. Muenker, and T. Betz, “Multi-oscillation microrheology via acoustic force spectroscopy enables frequency-dependent measurements on endothelial cells at high-throughput,” *Lab on a Chip*, vol. 21, no. 10, pp. 1929–1947, 2021. Publisher: Royal Society of Chemistry (RSC).
- [24] H. B. Callen and T. A. Welton, “Irreversibility and generalized noise,” *Phys. Rev.*, vol. 83, pp. 34–40, Jul 1951.
- [25] G. E. Crooks, “Entropy production fluctuation theorem and the nonequilibrium work relation for free energy differences,” *Phys. Rev. E*, vol. 60, pp. 2721–2726, Sep 1999.
- [26] C. P. Brangwynne, T. J. Mitchison, and A. A. Hyman, “Active liquid-like behavior of nucleoli determines their size and shape in *Xenopus laevis* oocytes,” *Proceedings of the National Academy of Sciences*, vol. 108, pp. 4334–4339, Mar. 2011. Publisher: National Academy of Sciences Section: Biological Sciences.
- [27] M. Almonacid, W. W. Ahmed, M. Bussonnier, P. Mailly, T. Betz, R. Voituriez, N. S. Gov, and M.-H. Verlhac, “Active diffusion positions the nucleus in mouse oocytes,” *Nature Cell Biology*, vol. 17, pp. 470–479, Apr. 2015. Number: 4 Publisher: Nature Publishing Group.
- [28] C. Lin, M. Schuster, S. C. Guimaraes, P. Ashwin, M. Schrader, J. Metz, C. Hacker, S. J. Gurr, and G. Steinberg, “Active diffusion and microtubule-based transport oppose myosin forces to position organelles in cells,” *Nature Communications*, vol. 7, p. 11814, June 2016. Number: 1 Publisher: Nature Publishing Group.
- [29] A. Colin, G. Letort, N. Razin, M. Almonacid, W. Ahmed, T. Betz, M.-E. Terret, N. S. Gov, R. Voituriez, Z. Gueroui, and M.-H. Verlhac, “Active diffusion in oocytes nonspecifically centers large objects during prophase I and meiosis I,” *The Journal of Cell Biology*, vol. 219, p. e201908195, Mar. 2020.
- [30] W. W. Ahmed, É. Fodor, M. Almonacid, M. Bussonnier, M.-H. Verlhac, N. Gov, P. Visco, F. van Wijland, and T. Betz, “Active Mechanics Reveal Molecular-Scale Force Kinetics in Living Oocytes,” *Biophysical Journal*, vol. 114, pp. 1667–1679, Apr. 2018.
- [31] T. Betz, M. Lenz, J.-F. Joanny, and C. Sykes, “ATP-dependent mechanics of red blood cells,” *Proceedings of the National Academy of Sciences*, vol. 106, pp. 15320–15325, Sept. 2009. Publisher: National Academy of Sciences Section: Biological Sciences.
- [32] A. Bonfanti, J. L. Kaplan, G. Charras, and A. Kabla, “Fractional viscoelastic models for power-law materials,” vol. 16, no. 26, pp. 6002–6020.
- [33] I. A. Martínez, G. Bisker, J. M. Horowitz, and J. M. Parrondo, “Inferring broken detailed balance in the absence of observable currents,” *Nature communications*, vol. 10, no. 1, pp. 1–10, 2019.
- [34] N. G. van Kampen, *Stochastic Processes in Physics and Chemistry*. Elsevier, 1992.



- [35] M. Schwarzl, A. Godec, and R. Metzler, “Quantifying non-ergodicity of anomalous diffusion with higher order moments,” *Scientific Reports*, vol. 7, no. 1, p. 3878, 2017.
- [36] R. Metzler, J.-H. Jeon, A. G. Cherstvy, and E. Barkai, “Anomalous diffusion models and their properties: non-stationarity, non-ergodicity, and ageing at the centenary of single particle tracking,” *Phys. Chem. Chem. Phys.*, vol. 16, p. 24128–24164, 2014.
- [37] É. Fodor, R. L. Jack, and M. E. Cates, “Irreversibility and biased ensembles in active matter: Insights from stochastic thermodynamics,” *Annual Review of Condensed Matter Physics*, vol. 13, no. 1, p. 215–238, 2022.
- [38] R. L. Jack and P. Sollich, “Effective interactions and large deviations in stochastic processes,” *The European Physical Journal Special Topics*, vol. 224, no. 12, p. 2351–2367, 2015.
- [39] A. Lapolla and A. Godec, “Unfolding tagged particle histories in single-file diffusion: exact single- and two-tag local times beyond large deviation theory,” *New Journal of Physics*, vol. 20, p. 113021, nov 2018.
- [40] I. Z. Steinberg, “On the time reversal of noise signals,” *Biophysical journal*, vol. 50, no. 1, pp. 171–179, 1986.
- [41] H. Risken, *The Fokker-Planck Equation*. Berlin: Springer-Verlag, 2nd ed., 1989.
- [42] C.-L. Tsai, J.-C. Chen, and W.-J. Wang, “Near-infrared absorption property of biological soft tissue constituents,” *Journal of Medical and Biological Engineering*, vol. 21, pp. 7–14, 01 2001.
- [43] W. M. Lee, P. J. Reece, R. F. Marchington, N. K. Metzger, and K. Dholakia, “Construction and calibration of an optical trap on a fluorescence optical microscope,” *Nature Protocols*, vol. 2, pp. 3226 EP –, Dec 2007.
- [44] A. Farré and M. Montes-Usategui, “A force detection technique for single-beam optical traps based on direct measurement of light momentum changes,” vol. 18, no. 11, pp. 11955–11968. Publisher: Optical Society of America.
- [45] F. Marsà, A. Farré, E. Martín-Badosa, and M. Montes-Usategui, “Holographic optical tweezers combined with back-focal-plane displacement detection,” *Opt. Express*, vol. 21, pp. 30282–30294, Dec 2013.
- [46] T. G. Mason and D. A. Weitz, “Optical Measurements of Frequency-Dependent Linear Viscoelastic Moduli of Complex Fluids,” *Physical Review Letters*, vol. 74, pp. 1250–1253, Feb. 1995. Publisher: American Physical Society.
- [47] H. Schürmann, A. Russo, A. D. Hofemeier, M. Brandt, J. Roth, T. Vogl, and T. Betz, “2.5D Traction in monocytes reveal mesoscale mechanics of podosomes during substrate indenting cell protrusion,” tech. rep., bioRxiv, June 2021. Section: New Results Type: article.

## Acknowledgements

We thank the Institute for Immunology from the University of Münster for providing us with HoxB8 cells and the corresponding resources. The authors thank M. Kardar and J. Enderlein for helpful discussion. TM and TB have received funding from the European Research Council (ERC) under the European Union’s Horizon 2020 research and innovation programme (PolarizeMe, Grant agreement No. 771201). The authors thank R. Jain for discussions at the early stages of this work.

## Author information

### Affiliations

**Third Institute of Physics, Georg August Universität Göttingen, Göttingen, Germany**

Till M. Muenker, Timo Betz

**Institute for Theoretical Physics, Georg August Universität Göttingen, Göttingen, Germany**

Gabriel Knotz, Matthias Krüger

### Contributions

T.B and M.K conceived the study. M.K and G.K established the theoretical framework of MBR. T.M.M designed and performed all experiments. T.M.M performed data analysis. G.K performed simulations. All authors performed data interpretation, discussion and wrote the manuscript.

### Corresponding authors

Correspondence to

Timo Betz: [timo.betz@phys.uni-goettingen.de](mailto:timo.betz@phys.uni-goettingen.de)

Matthias Krüger: [matthias.kruger@uni-goettingen.de](mailto:matthias.kruger@uni-goettingen.de)

## Ethics declaration

### Competing interests

No competing interests

## Extended data figures

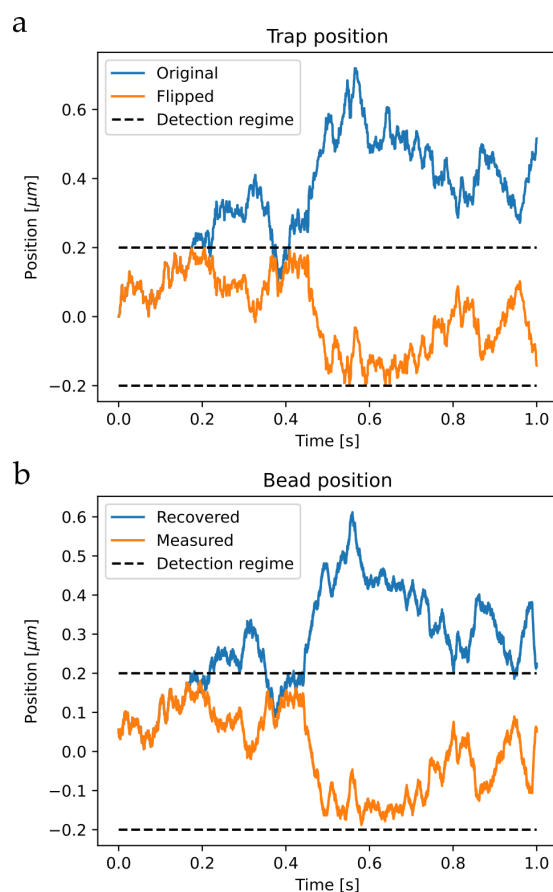

Extended Data Figure 1: Trajectory flipping. a For certain levels of activity  $D_q$ , the trap trajectory (blue) would exceed the area were position detection is possible. Therefore the original trajectory was flipped each time it would leave the indicated regime. b The bead position in response to the trap position was measured (blue). To recover the trajectory of a particle subject to a trap diffusion  $D_q$ , the trajectory was flipped at equal time points to the trap trajectory (orange).

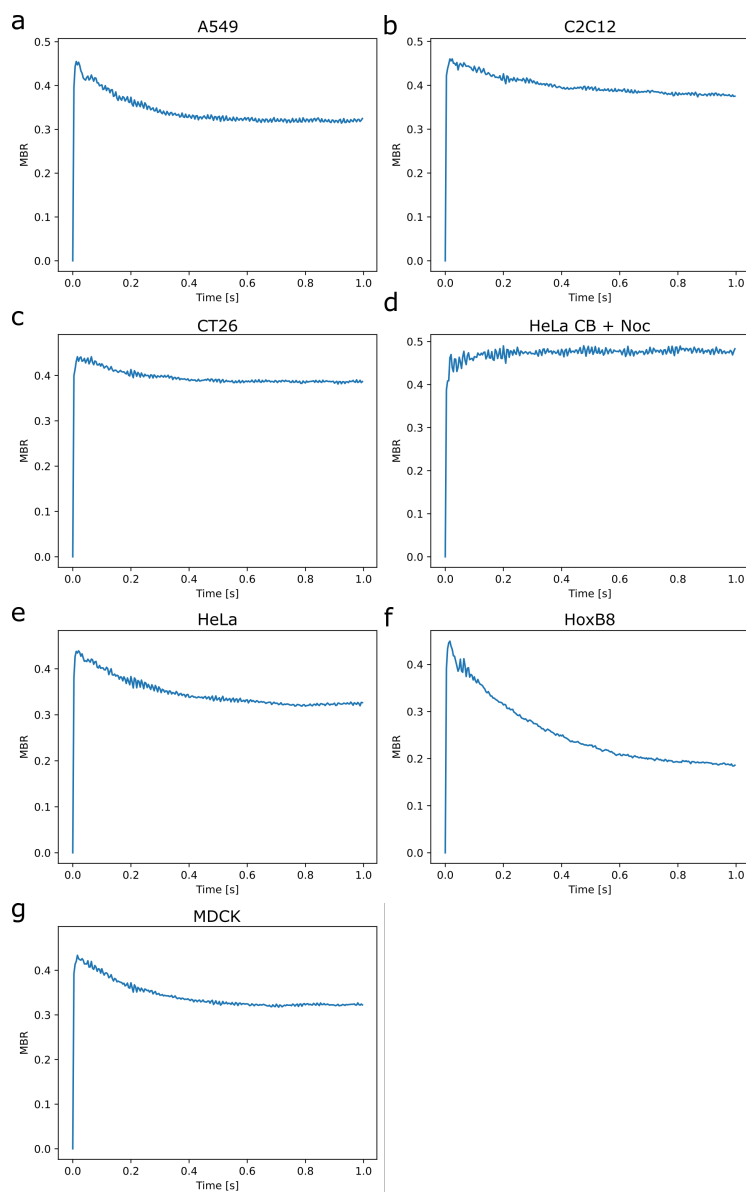

Extended Data Figure 2: MBR calculated for individual cell types

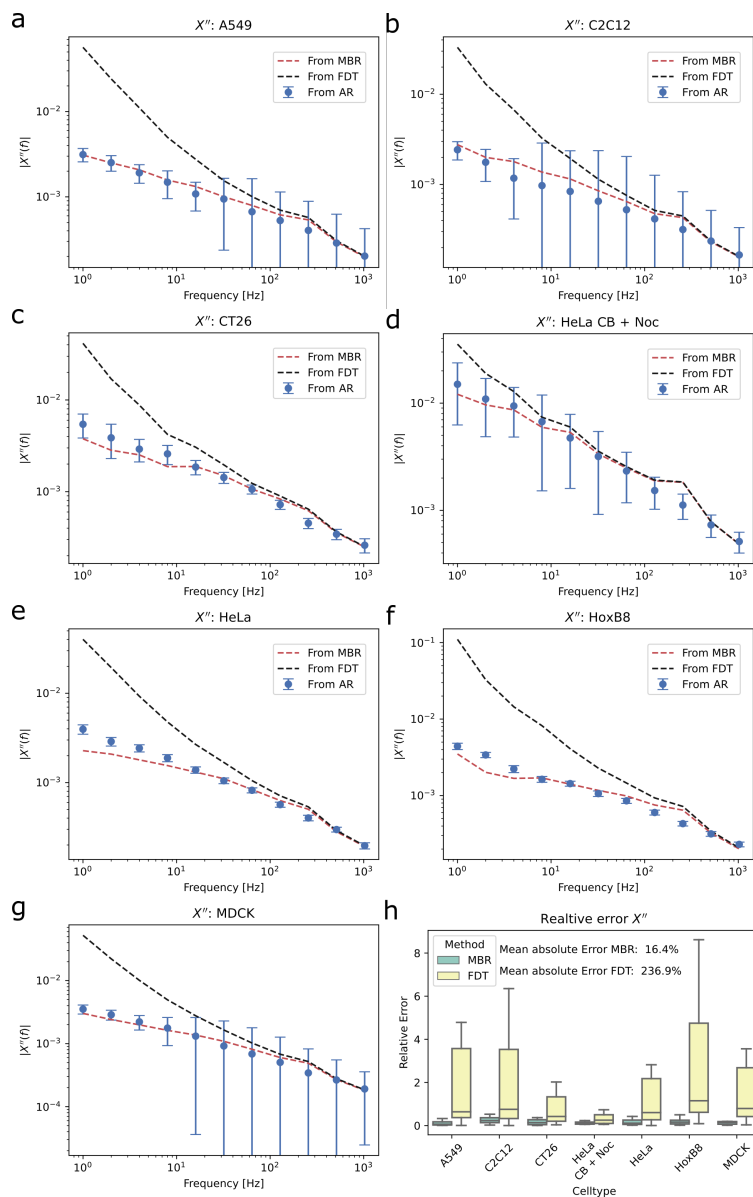

Extended Data Figure 3: Comparison of MBR approach, classical active and passive rheology approach and naive approach assuming validity of the FDT. a-g Response functions of all cell types derived from active rheology AR, derived assuming a passive system and using fluctuation dissipation theorem FDT and derived using the novel MBR approach. h Relative error between MBR/FDT method and the established AR approach. For all cell types, the novel MBR approach shows less deviation from AR results.

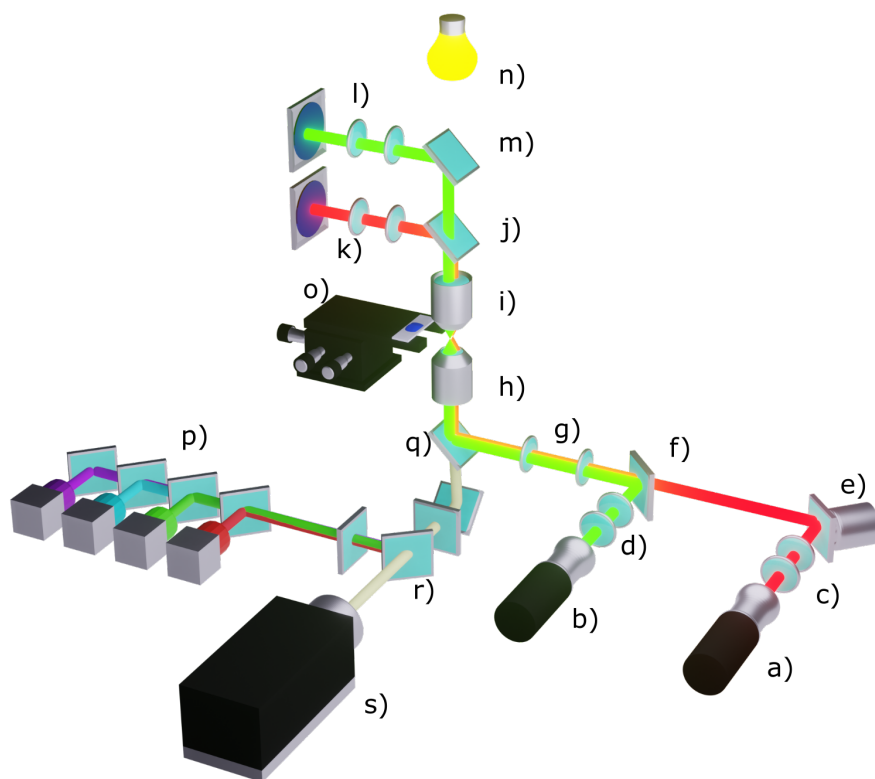

Extended Data Figure 4: Optical tweezers setup. a) 808 nm trapping laser. b) 967 nm detection laser. c) 5x telescope. d) 3x telescope. e) piezo tilting platform with mirror. f) dichroic mirror. g) 4f configuration. h) 60x NA 1.2 Objective. i) NA1.4 condenser. j) dichroic mirror. k) BFP projection onto PSD. l) BFP projection onto QPD. m) dichroic mirror. n) 620 nm brightfield LED. o) stage. p) 405/490/565/660 nm fluorescence LEDs. q) dichroic mirror. r) 4 band beam splitter. s): camera.

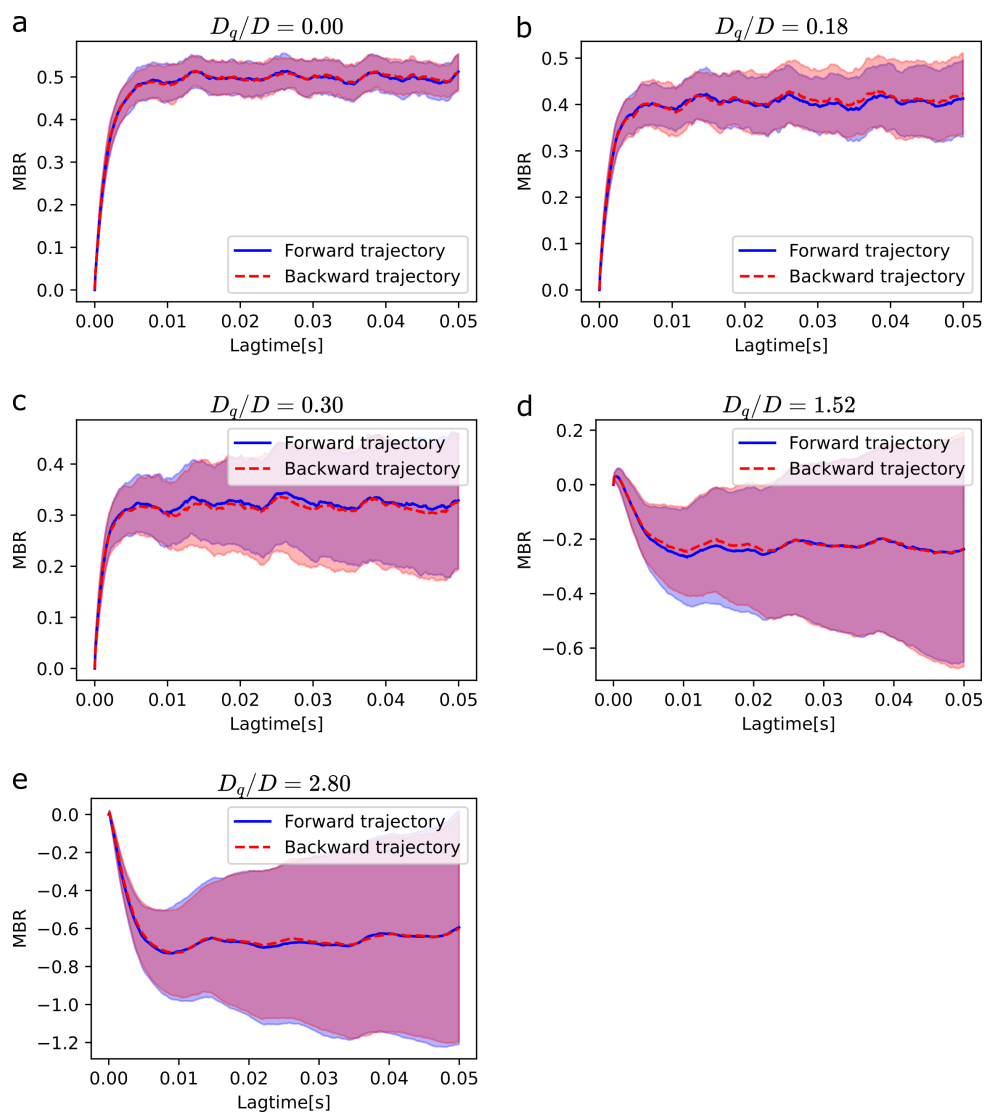

Extended Data Figure 5: MBR calculated for the motor model. The MBR is determined from original (forward trajectory, blue) and time reversed trajectories (backward trajectory, red). Independent of the level of activity  $D_q/D$ , there seems to be no differences between forward and backward trajectory. Hence, time reversibility is given. Presented errors are given as  $\pm$  standard deviation.



## Supplementary Information

### SI 1 PSD for diffusing potential model

To avoid problems with the Wiener–Khinchin theorem, which connects the correlation function with the PSD, we used the relation between the MSD and the correlation function to get an equivalent measure for the PSD in the motor model. This avoids a possible problem that may arise because the motor model is, mathematically, not in a wide sense stationary process. The MSD and the correlation function are connected via  $\langle (x(t) - x(0))^2 \rangle = \langle x^2 \rangle - \langle x(t)x(0) \rangle$  where  $\langle x(t)x(0) \rangle$  is well defined in a stationary process, but not for the motor model. In contrast, the MSD is finite and well defined. With this, we can use the Fourier transform of the MSD as an equivalent measure for the PSD. To numerically perform the transformation we first Fourier transform the second derivative of the MSD and add the transformation of the short time linear term manually.

### SI 2 Effective Energy for diffusing potential

We begin describing the behaviour of a probe particle with size  $R$  suspended in a liquid of viscosity  $\eta$  trapped in a harmonic potential of stiffness  $\kappa$ . The position of the particle is denoted as  $x(t)$  while the position of the trap is denoted with  $q(t)$ . The system can be described using 2 stochastic differential equations.

$$\gamma \dot{x}(t) + \kappa (x(t) - q(t)) = \sqrt{2k_B T \gamma} F_x(t) \quad (36)$$

$$\gamma_q \dot{q}(t) = \sqrt{2k_B T \gamma_q} F_q(t) \quad (37)$$

$\gamma$  and  $\gamma_q$  are friction coefficients of the fluid and a pseudo friction for the trap (which does not really feel a friction).  $F(t)$  denotes a stochastic process with properties:

$$\langle (F(t), F(t')) \rangle = \delta(t - t'), \langle F(t) \rangle = 0 \quad (38)$$

We begin by Fourier transforming the system of differential equations:

$$2\pi i f \bar{x}(f) + \frac{\kappa}{\gamma} (\bar{x}(f) - \bar{q}(f)) = \sqrt{2D} \bar{F}_x(f) \quad (39)$$

$$2\pi i f \bar{q}(f) = \sqrt{2D_q} \bar{F}_q(f) \quad (40)$$

We can now insert 40 into 39 and solve for  $\bar{x}(f)$ :

$$\bar{x}(f) = \frac{\sqrt{2D} \bar{F}_x(f)}{2\pi i f + \frac{\kappa}{\gamma}} + \frac{\kappa}{\gamma} \frac{\sqrt{2D_q} \bar{F}_q(f)}{2\pi i f + \frac{\kappa}{\gamma}} \quad (41)$$

The power spectral density PSD is given as absolute square of the fourier transform:  $C(f) = |\bar{x}(f)|^2$ . In this calculation the mixed terms drop out and  $|\bar{F} \bar{F}^*|^2 = 1$  so that we end up with:

$$PSD_{active}(f) = |\bar{x}(f)|^2 = \frac{\frac{f_c^2}{f^2} D_q + D}{2\pi^2 (f^2 + f_c^2)} \quad (42)$$

with  $f_c = \frac{\kappa}{12\pi^2\eta R}$  being the corner frequency.

When the trap is stationary (passive system) the dynamics are given by

$$\gamma_0\dot{x}(t) + \kappa x(t) = \sqrt{2k_B T \gamma_0} F(t) \quad (43)$$

which results in a PSD of :

$$PSD_{passive}(f) = \frac{D}{2\pi^2(f^2 + f_c^2)} \quad (44)$$

The effective energy in terms of  $k_B T$  is given as the ratio of these power spectral densities:

$$\frac{E_{eff}}{k_B T} = \frac{PSD_{active}}{PSD_{passive}} = \frac{f_c^2 D_q}{f^2 D} + 1 \quad (45)$$
